# Supplementary material for: Methylglyoxal Acts as a Tumor-Promoting Factor in Anaplastic Thyroid Cancer
Source: PubMed Central journal article supplement (PMC6627963; doi:10.3390/cells8060547), 2019-06-06
Supplement: cells-08-00547-s001.pdf [file cells-08-00547-s001.pdf]

A)

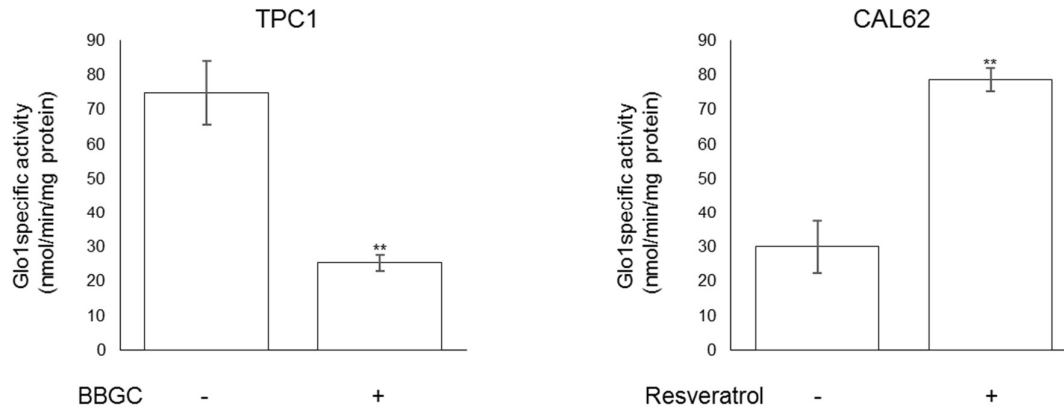

**Figure S1.** Biochemical evidence of S-p-Bromobenzylglutathione cyclopentyl diester (BBGC) and Resveratrol effectiveness on Glyoxalase 1 (Glo1) enzyme activity. (A) Effect of BBGC on glo1 specific activity in a papillary thyroid cancer cell line (TPC1); (B) effect of Resveratrol on an anaplastic thyroid cancer cell line (CAL62). Glo1 specific activity was measured by spectrophotometry as described in Materials and Methods. Histograms indicate mean  $\pm$  SD of three different cultures, and each was tested in triplicate. \*\* $p < 0.01$

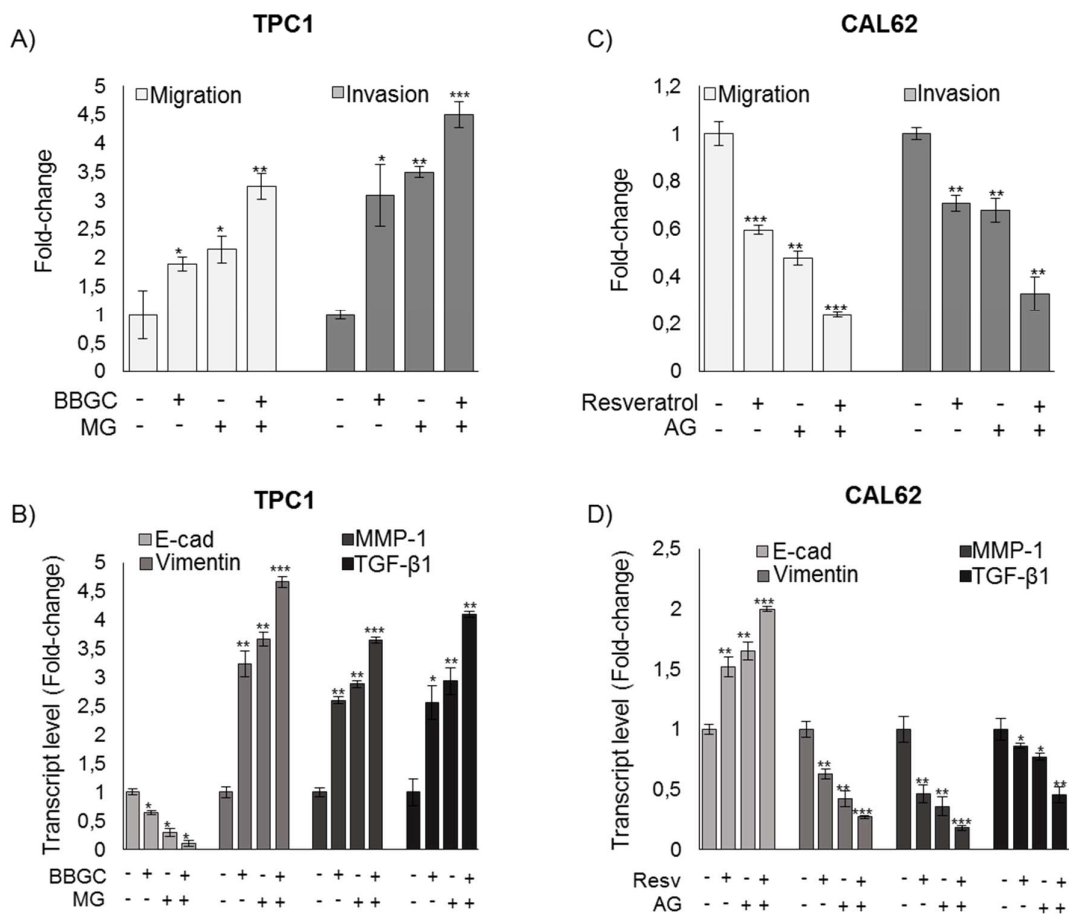

**Figure S2.** Effect of Methylglyoxal (MG), upon BBGC treatment, on (A) migration and invasion or (B) E-cadherin (E-cad), vimentin, MMP-1 and TGF-β1 expression in papillary thyroid cancer TPC1 cells. Effect of aminoguanidine (AG), upon Resveratrol treatment, on (C) migration and invasion or (D) E-cad, vimentin, MMP-1 and TGF-β1 expression in anaplastic thyroid cancer CAL62 cells. Migration and invasion capabilities were measured by using specific assay as described in Materials and Methods. Gene transcript levels were evaluated by real-time PCR. Histograms indicate mean ± SD of three different cultures, and each was tested in triplicate. \*p < 0.05, \*\*p < 0.01, \*\*\*p < 0.001
